# Supplementary material
Source: MDPI journal article supplement (https://www.mdpi.com/2072-4292/15/11/2744)
Supplement: s1 [file s1]

# Quantifying Multi-Source Uncertainties in GRACE-Based Estimates of Groundwater Storage Changes in Mainland China

Quanzhou Li <sup>1,2</sup>, Yun Pan <sup>1,2,\*</sup>, Chong Zhang <sup>1,2</sup> and Huili Gong <sup>1,2</sup>

<sup>1</sup> Beijing Laboratory of Water Resources Security, Capital Normal University, Beijing 100048, China; 2210902036@cnu.edu.cn (Q.L.); chongzhang@cnu.edu.cn (C.Z.); gonghl@cnu.edu.cn (H.G.)

<sup>2</sup> College of Resources Environment and Tourism, Capital Normal University, Beijing 100048, China

\* Correspondence: pan@cnu.edu.cn

Table. S1. Inventory of degree-day model-driven data and global glacier datasets

| Data Categories                            | Data Description                         | The Data Source                                                                                                                                                                                     |
|--------------------------------------------|------------------------------------------|-----------------------------------------------------------------------------------------------------------------------------------------------------------------------------------------------------|
| Temperature and Precipitation              | ERA5-Land (1999-2020; 0.1°×0.1°)         | <a href="https://cds.climate.copernicus.eu">https://cds.climate.copernicus.eu</a>                                                                                                                   |
| Snow depth                                 | ERA5-Land (1999.01; 0.1°×0.1°)           |                                                                                                                                                                                                     |
| Temperature and Precipitation Observations | 189 Station daily data (1999-2020; T, P) | China Meteorological Data Network, <a href="http://data.cma.cn">http://data.cma.cn</a>                                                                                                              |
|                                            | 100 Station daily data (1999-2020; T, P) | NOAA, <a href="https://www.ncei.noaa.gov">https://www.ncei.noaa.gov</a>                                                                                                                             |
|                                            | 356 Station daily data (1999-2020; T)    |                                                                                                                                                                                                     |
| Glacial Mass Balance                       | WGMS Glacier fluctuation database        | <a href="https://wgms.ch/">https://wgms.ch/</a>                                                                                                                                                     |
| Glacial Factor                             | Glacier distribution and profile         | The Randolph Glacier Inventory 6.0                                                                                                                                                                  |
|                                            | Degree day model factor                  | <a href="http://www.scidb.cn/">http://www.scidb.cn/</a>                                                                                                                                             |
| DEM                                        | ASTER GDEM 30m                           | Geospatial Data Cloud, <a href="http://www.gscloud.cn">http://www.gscloud.cn</a>                                                                                                                    |
| Global Glacier Dataset                     | 0.5°× 0.5°(2000-2020)                    | <a href="https://www.sedoo.fr/theia-publication-products/?uuid=c428c5b9-df8f-4f86-9b75-e04c778e29b9">https://www.sedoo.fr/theia-publication-products/?uuid=c428c5b9-df8f-4f86-9b75-e04c778e29b9</a> |

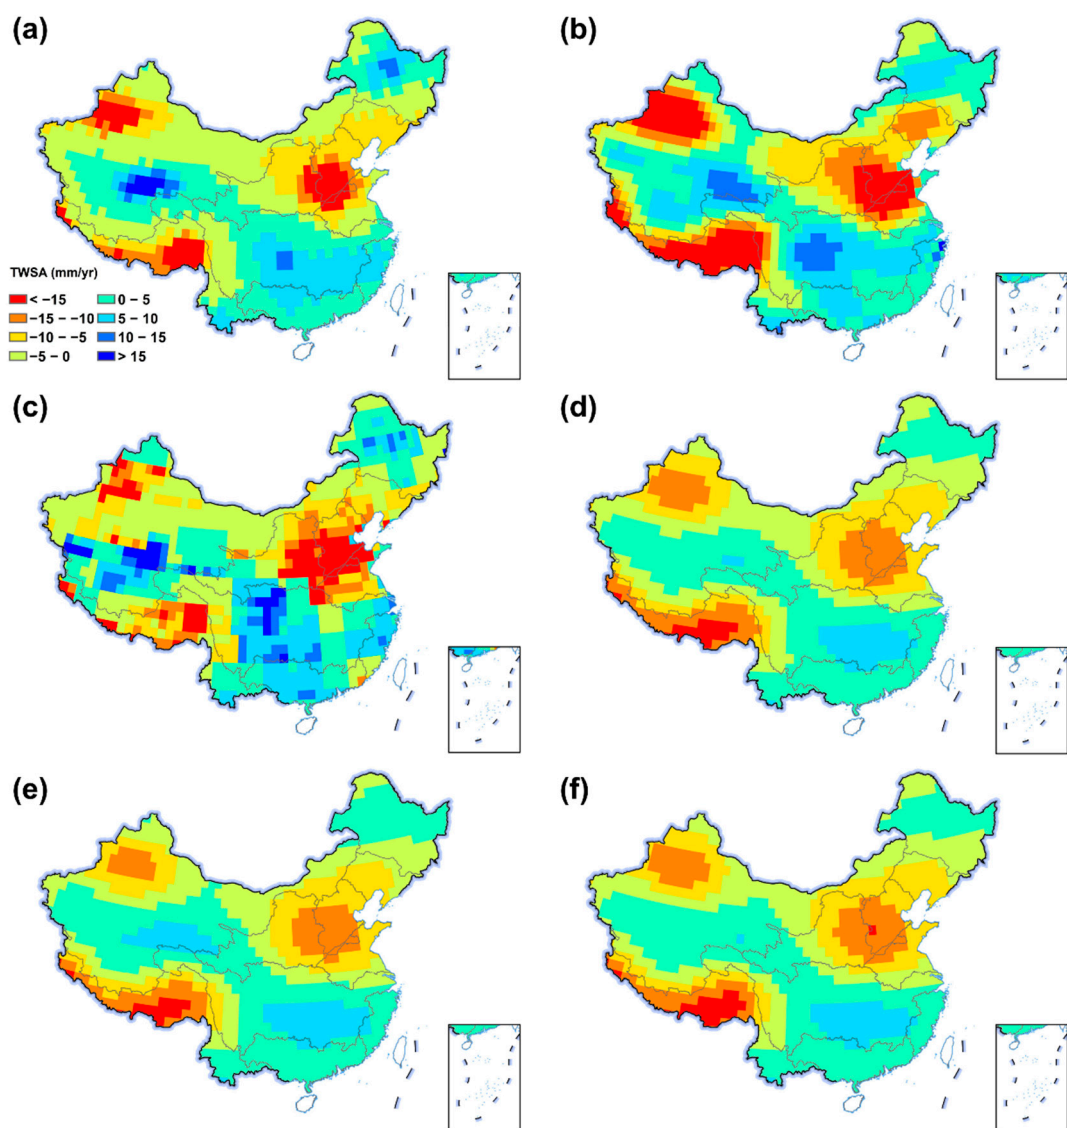

**Figure S1.** Spatial distribution of annual trends for six GRACE products from 2003-2015 (in mm/yr): (a) CSR mascon; (b) GSFC mascon; (c) JPL mascon; (d) CSR SH; (e) GFZ SH; (f) JPL SH.

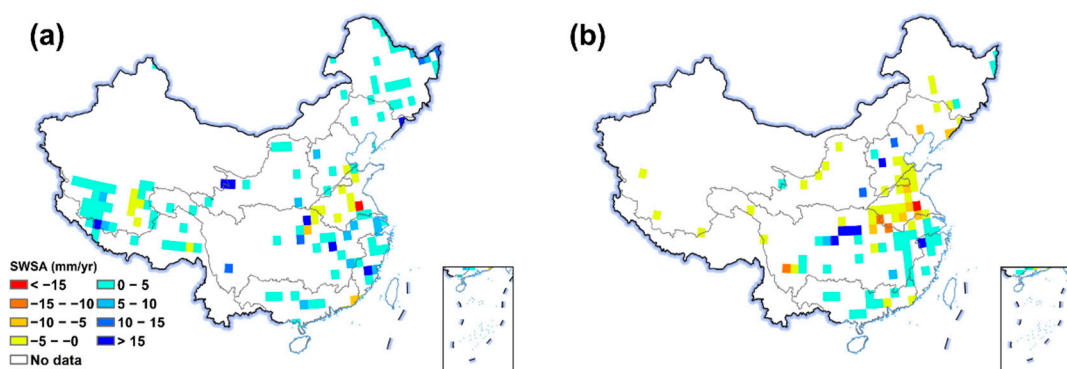

**Figure S2.** Spatial distribution of annual trends for two SWSA products from 2003-2015 (in mm/yr): (a) WGHM; (b) PCR-GLOBWB.

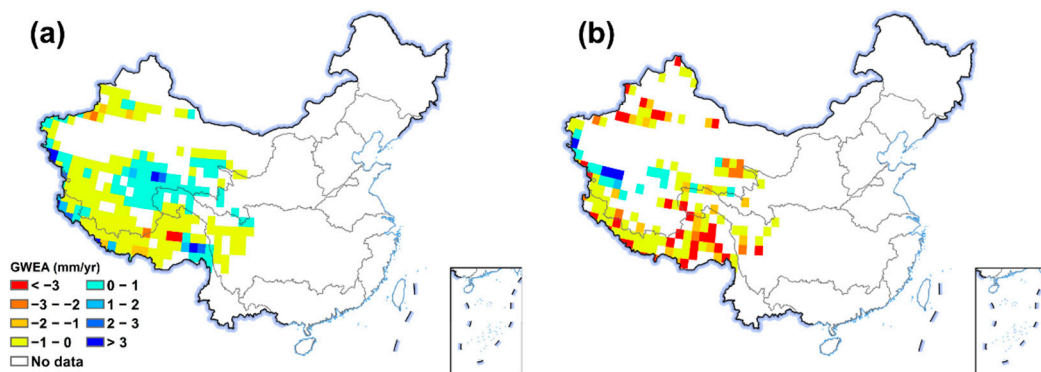

**Figure S3.** Spatial distribution of annual trends for two GWEA products from 2003-2015 (in mm/yr): (a) Degree-Day model (b) Global Glacier Dataset.

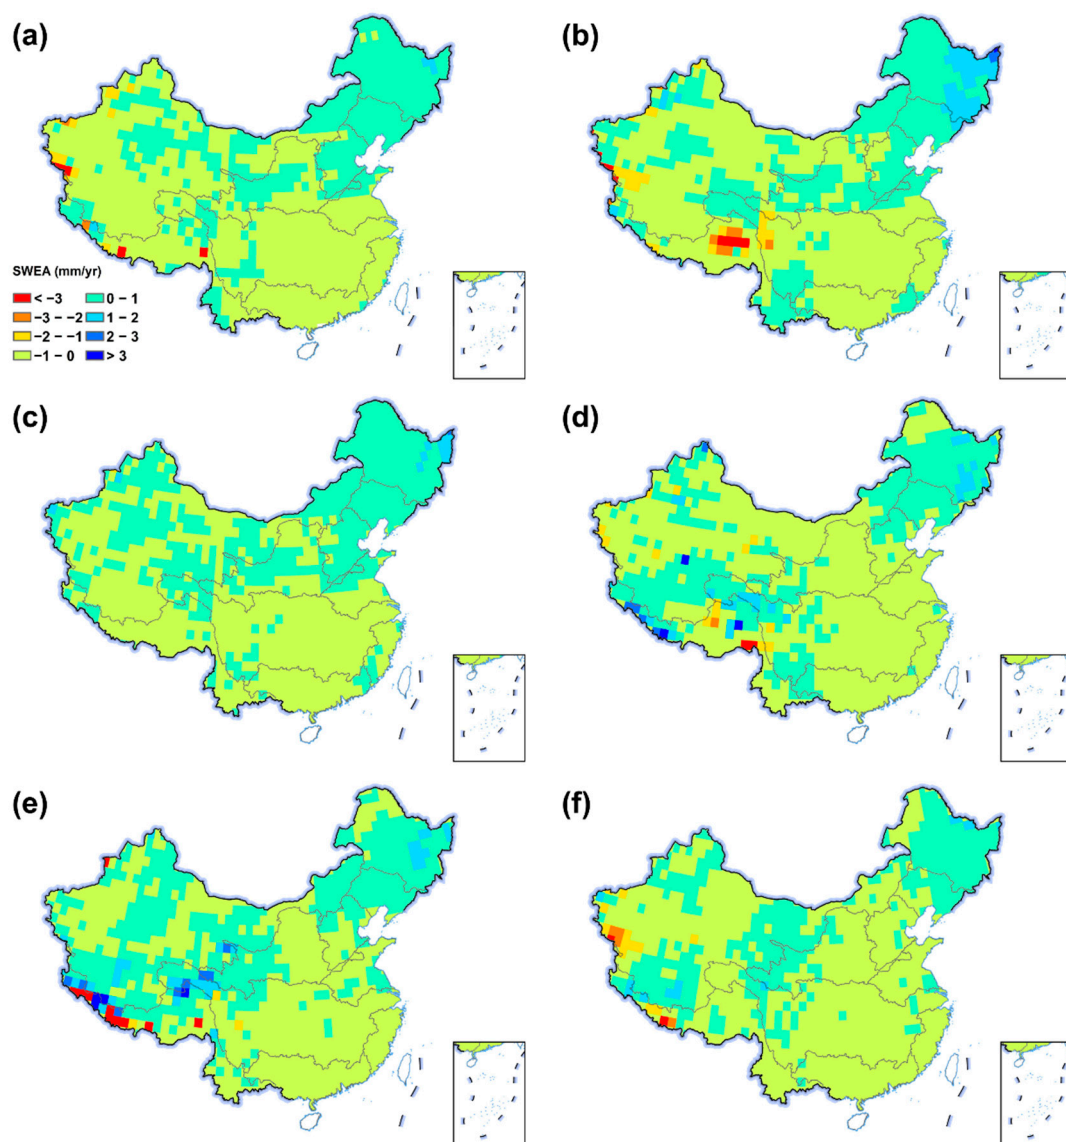

**Figure S4.** Spatial distribution of annual trends for six SWEA products from 2003-2015 (in mm/yr): (a) NOAH (b) VIC; (c) CLSM; (d) ERA5; (e) WGHM; (f) PCR-GLOBWB.

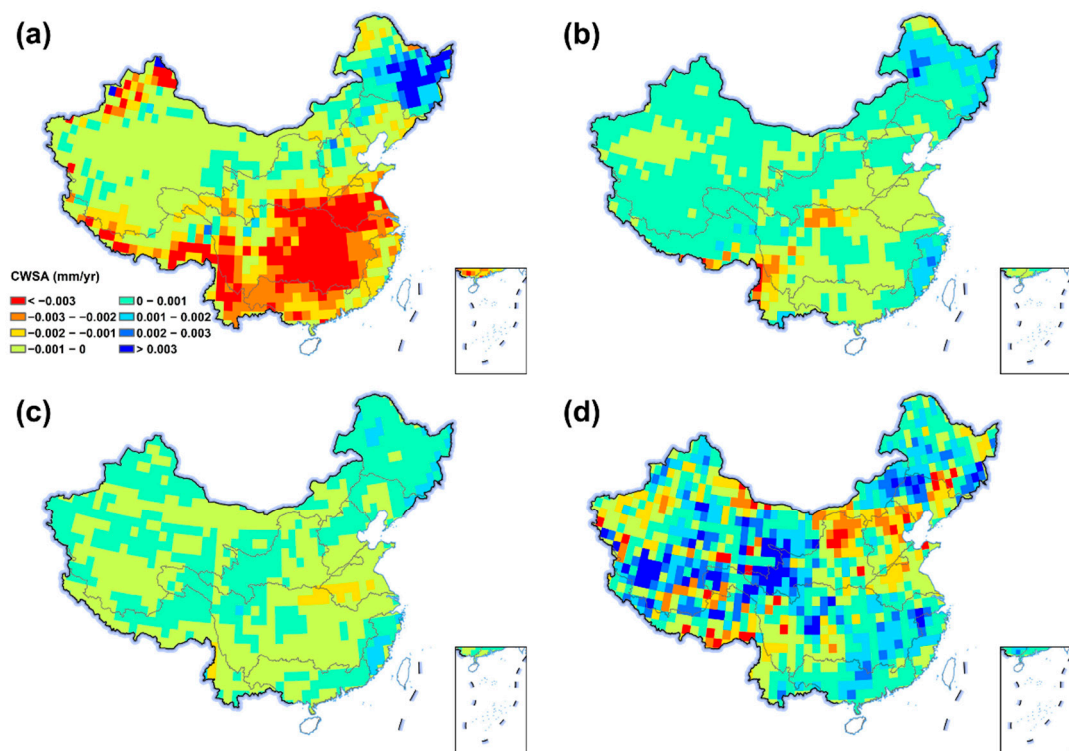

**Figure S5.** Spatial distribution of annual trends for six CWSA products from 2003-2015 (in mm/yr): (a) NOAH (b) VIC; (c) CLSM; (d) WGHM.

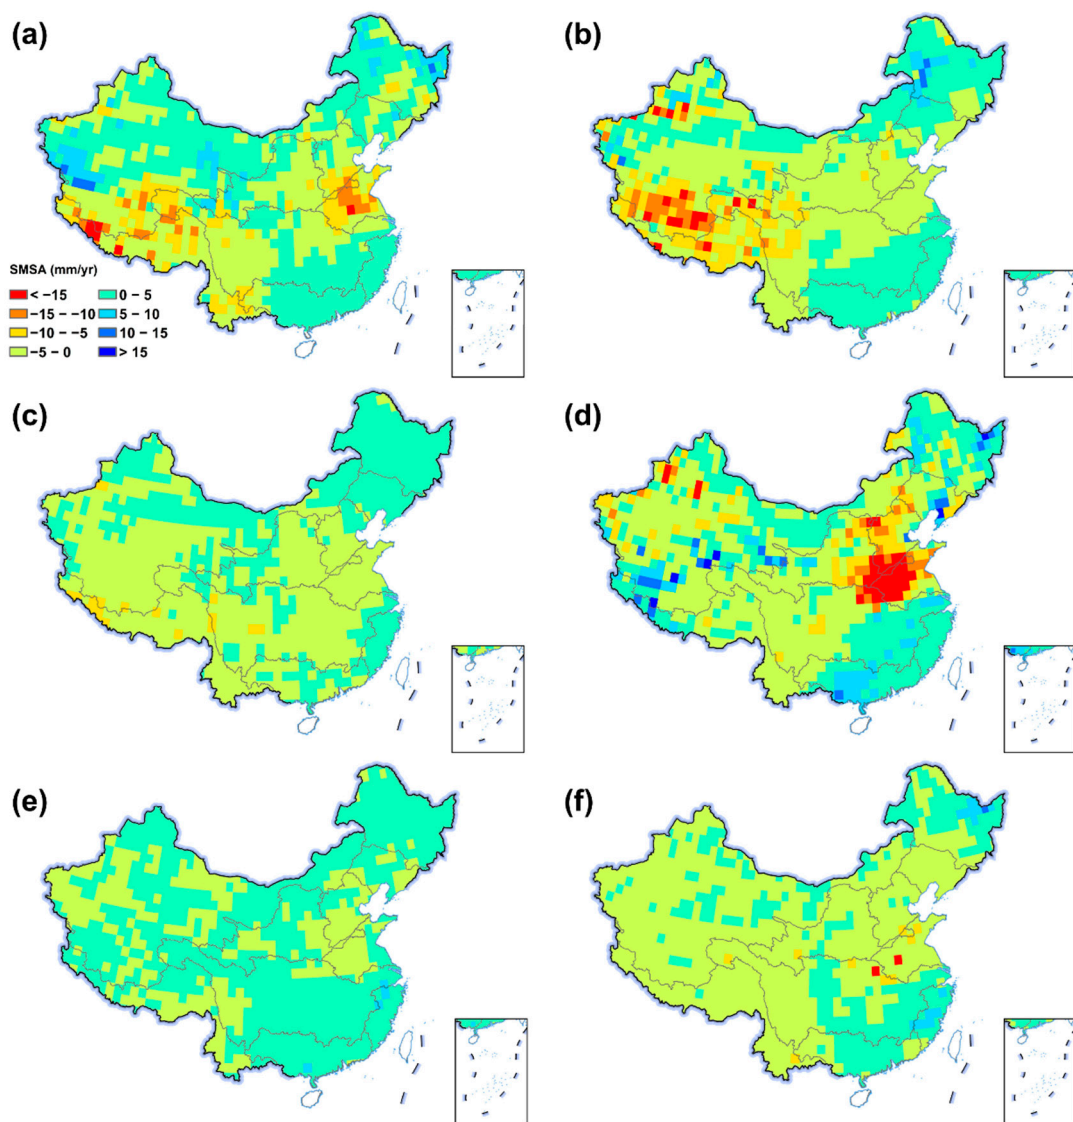

**Figure S6.** Spatial distribution of annual trends for six SWSA products from 2003-2015 (in mm/yr): (a) NOAH (b) VIC; (c) CLSM; (d) ERA5; (e) WGHM; (f) PCR-GLOBWB.



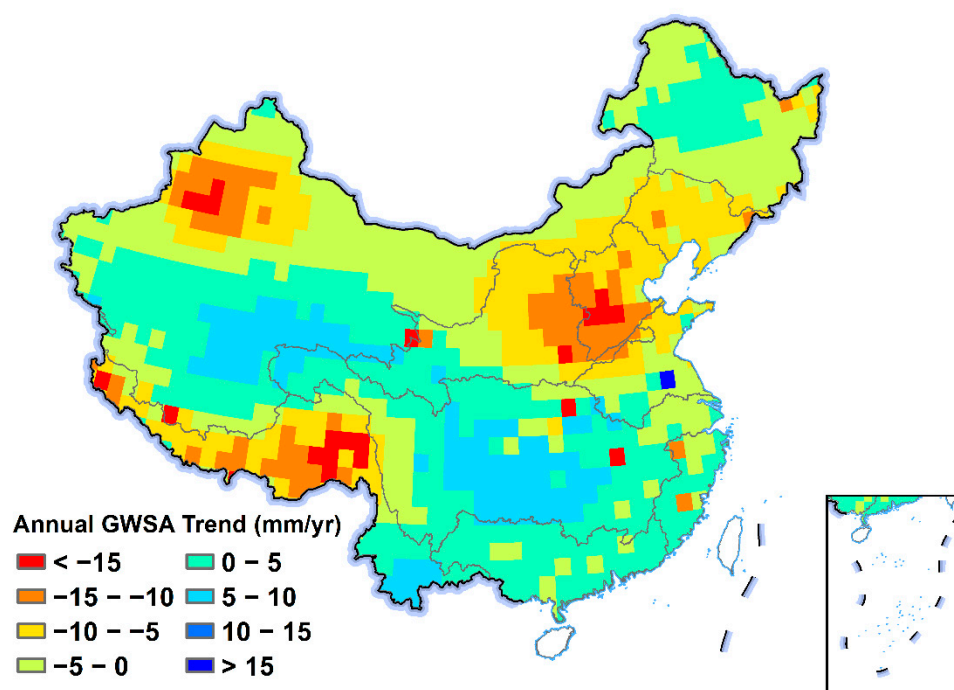

Figure S7. Spatial distribution of mean annual trends of 3,456 GWSA results from 2003-2015 (in mm/yr).
